# Supplementary material
Source: PubMed Central journal article supplement (PMC3975261)

## Supplemental data for the manuscript

### The type I BMP receptor, Alk3, is required for the induction of hepatic hepcidin gene expression by interleukin-6

Claire Mayeur<sup>1</sup>, Lisa K. Lohmeyer<sup>#1</sup>, Patricio Leyton<sup>1</sup>, Sonya M. Kao<sup>1</sup>, Alexandra E. Pappas<sup>1</sup>, Starsha A Kolodziej<sup>1</sup>, Ester Spagnoli<sup>1</sup>, Binglan Yu<sup>1</sup>, Rita L. Galdos<sup>2</sup>, Paul B. Yu<sup>3,4</sup>, Randall T. Peterson<sup>3</sup>, Donald B. Bloch<sup>1,2</sup>, Kenneth D. Bloch<sup>\*1,3</sup>, and Andrea U. Steinbicker<sup>\*1,5</sup>

<sup>1</sup>Anesthesia Center for Critical Care Research of the Department of Anesthesia, Critical Care, and Pain Medicine, Massachusetts General Hospital and Harvard Medical School, Boston, MA 02114, USA

<sup>2</sup>Rheumatology, Allergy, and Immunology Division and <sup>3</sup>Cardiovascular Research Center of the Department of Medicine, Massachusetts General Hospital and Harvard Medical School, Boston, MA 02114, USA

<sup>4</sup>Cardiovascular Division, Brigham and Women`s Hospital, Boston, MA 02115, USA

<sup>5</sup>Department of Anesthesiology, Intensive Care and Pain Medicine, University Hospital Muenster, University of Muenster, 48149 Muenster, Germany

<sup>#</sup>Current address: Clinic for Hematology, Oncology and Stem Cell Transplantation, University Medical Center Freiburg, 79095 Freiburg, Germany

\*Drs. Bloch and Steinbicker contributed equally to the manuscript.

**Running title:** Alk3 and interleukin-6 mediated hepcidin induction

Correspondence should be addressed to:

Andrea U. Steinbicker, MD, MPH

Department of Anesthesiology, Intensive Care and Pain Medicine

University Hospital Muenster

Albert-Schweitzer Campus 1, Gebäude A1

48149 Muenster

Germany

Phone: 0049-251-83-47898

Fax: 0049-251-83-48667

Email: [andrea.steinbicker@ukmuenster.de](mailto:andrea.steinbicker@ukmuenster.de), [andrea.steinbicker@gmail.com](mailto:andrea.steinbicker@gmail.com)

Scientific category: Red Cells, Iron, and Erythropoiesis

## Supplemental Table

### Table S1.

*Sybr Primers:*

18S-F: 5'-CGGCTACCACTCCAAGGAA-3'

18S-R: 5'-GCTGGAATTACCGCGGCT-3'

hepcidin-F: 5`-CTGAGCAGCACCACTATCTC-3`

hepcidin-R: 5`-TGGCTCTAGGCTATGTTTTGC-3`

HO-1-F: 5'-AAGCCGAGAATGCTGAGTTCA-3'

HO-1-R: 5'-GCCGTGTAGATATGGTACAAGGA-3'

*Taqman primers:*

18S: Hs99999901\_s1 18S FAM

Hepcidin: Mm00519025\_m1 Hamp

Alk2: Mm00431646\_m1 Acvr1 FAM

Alk3: Bmpr1a- Mm00477650\_m1 Bmpr1a

Id-1: Mm00775963\_g1 Id1

**Table S1.** Sequences of Sybr primers, and Life technologies assay IDs of Taqman primers used for measuring mRNA levels with qRT-PCR.

## Supplemental Figures

**Figure S1. Hepatic hepcidin and HO-1 mRNA levels in mice injected with saline, Ad.GFP, or Ad.IL-6.** Eight-week-old C57Bl/6 male mice received an intravenous injection of saline (100  $\mu$ l), an adenovirus specifying green fluorescent protein (Ad.GFP,  $1.5 \times 10^{11}$  virus particles), or an adenovirus specifying interleukin 6 (Ad.IL-6,  $1.5 \times 10^{11}$  virus particles) (n=3, in each group). Mice were sacrificed 72 hours after injection. **(A)** Hepatic hepcidin mRNA levels (1 way-ANOVA, p=0.0034; \*p=0.0068: mice injected with saline vs mice injected with Ad.IL-6; #p=0.0079: mice injected with Ad.GFP vs mice injected with Ad.IL-6). **(B)** Hepatic HO-1 mRNA levels (1 way-ANOVA, p=0.0004; \*p=0.001: mice injected with saline vs mice injected with Ad.IL-6; #p=0.0034: mice injected with Ad.GFP vs mice injected with Ad.IL-6).

**Figure S2. Hepatic hepcidin and serum iron levels in C57Bl/6 mice injected with murine IL-6 (mIL-6).** Ten-week-old C57Bl/6 male mice were injected intraperitoneally with either mIL-6 (100 ng/g) or vehicle (0.1% BSA in PBS, 10  $\mu$ l/g, n=3-4 in each group). Two and 4 hours after injection, mice were sacrificed, blood was collected, and livers were harvested. **(A)** Hepatic hepcidin mRNA levels (#p<0.02: mice injected with mIL-6 vs vehicle, after 4 hours). **(B)** Serum iron levels.

**Figure S3. Liver and spleen iron content in mice injected with murine IL-6 or vehicle.** Four hours after intraperitoneal injection of mIL-6 or vehicle, mice were sacrificed, and liver and spleen were harvested. **(A)** Liver iron content (LIC) of *Alk2<sup>fl/fl</sup>* and *Alk2<sup>fl/fl</sup>; Alb-Cre* mice injected with mIL-6 or vehicle (1 way-ANOVA, p<0.0001; \*p=0.04: *Alk2<sup>fl/fl</sup>* mice injected with vehicle vs *Alk2<sup>fl/fl</sup>; Alb-Cre* mice injected with vehicle; #p=0.004: *Alk2<sup>fl/fl</sup>* mice injected with mIL-6 vs *Alk2<sup>fl/fl</sup>; Alb-Cre* mice injected

with mL-6). **(B)** Splenic iron content (SIC) of *Alk2<sup>fl/fl</sup>* and *Alk2<sup>fl/fl</sup>*; *Alb-Cre* mice injected with mL-6 or vehicle. **(C)** LIC of *Alk3<sup>fl/fl</sup>* and *Alk3<sup>fl/fl</sup>*; *Alb-Cre* mice injected with mL-6 or vehicle (1 way-ANOVA,  $p < 0.0001$ ; \* $p < 0.002$ : *Alk3<sup>fl/fl</sup>* mice injected with vehicle vs *Alk3<sup>fl/fl</sup>*; *Alb-Cre* mice injected with vehicle; # $p = 0.0006$ : *Alk3<sup>fl/fl</sup>* mice injected with mL-6 vs *Alk3<sup>fl/fl</sup>*; *Alb-Cre* mice injected mL-6). **(D)** SIC of *Alk3<sup>fl/fl</sup>* and *Alk3<sup>fl/fl</sup>*; *Alb-Cre* mice injected with mL-6 or vehicle (1 way-ANOVA,  $p = 0.0009$ ; \* $p = 0.012$ : *Alk3<sup>fl/fl</sup>* mice injected with vehicle vs *Alk3<sup>fl/fl</sup>*; *Alb-Cre* mice injected vehicle; # $p = 0.0025$ : *Alk3<sup>fl/fl</sup>* mice injected with mL-6 vs *Alk3<sup>fl/fl</sup>*; *Alb-Cre* mice injected with mL-6).

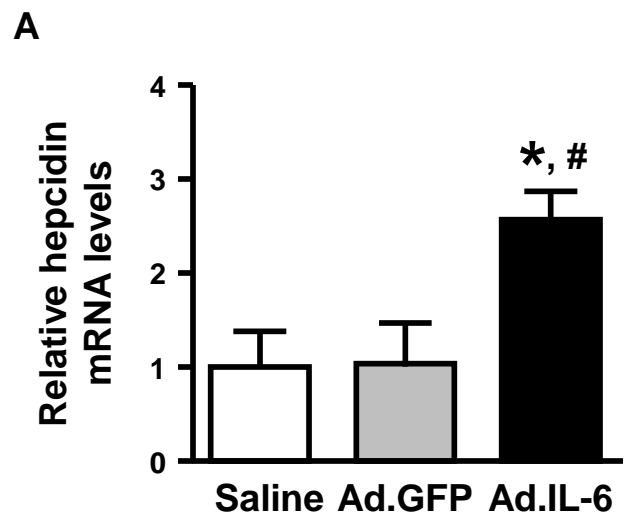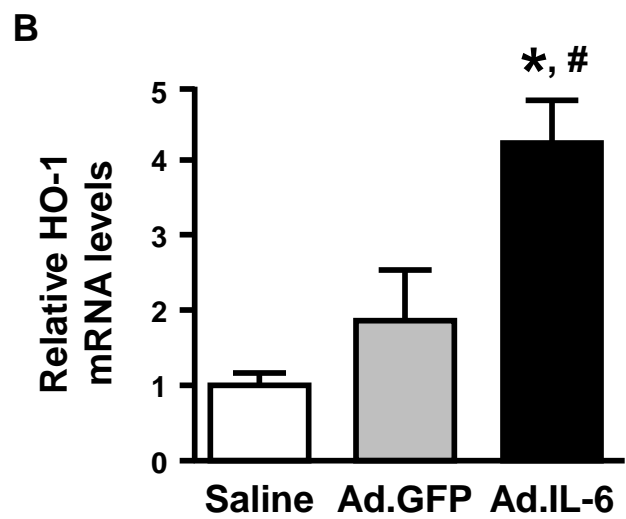

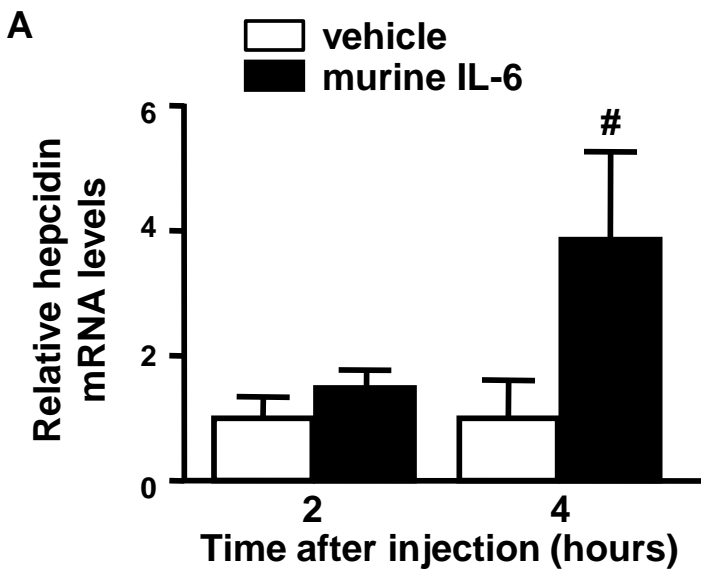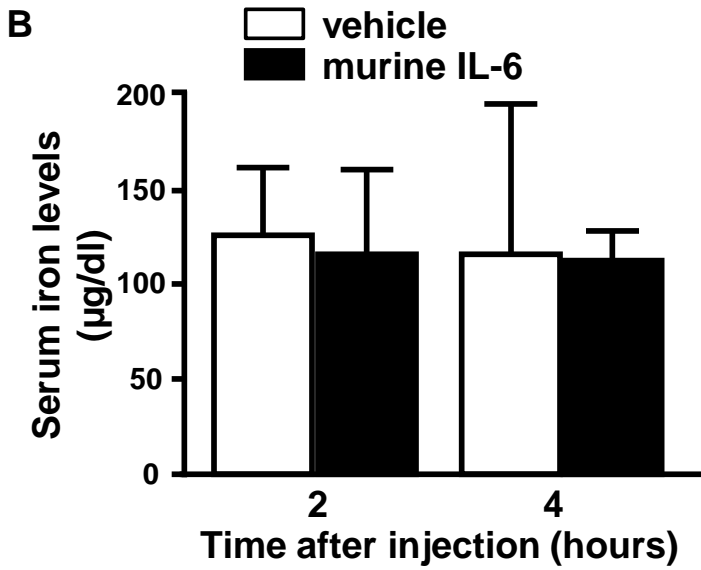

Supplemental Figure S3

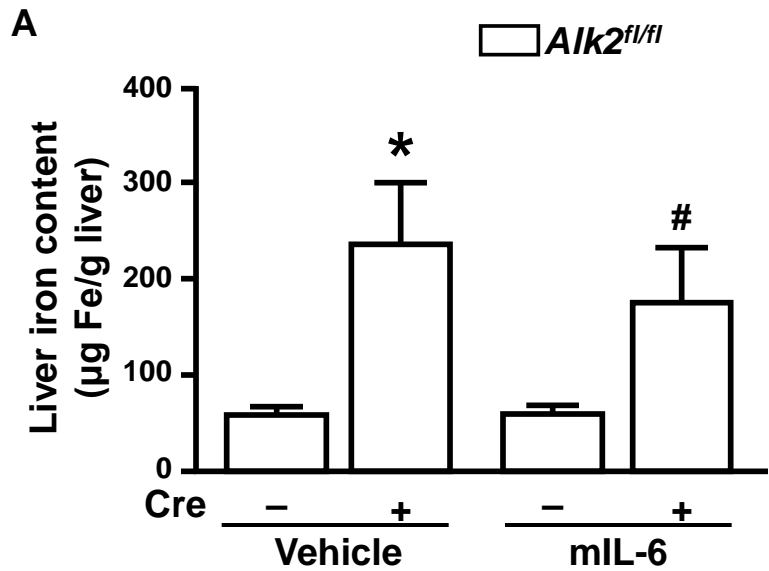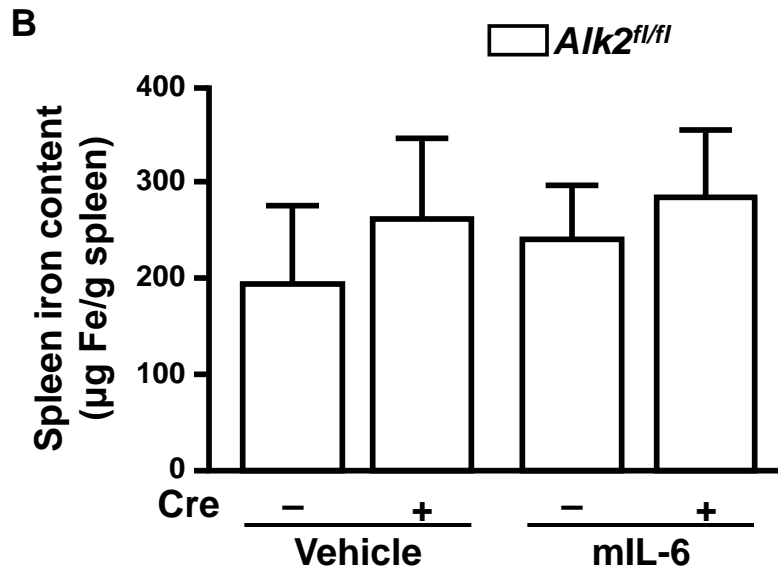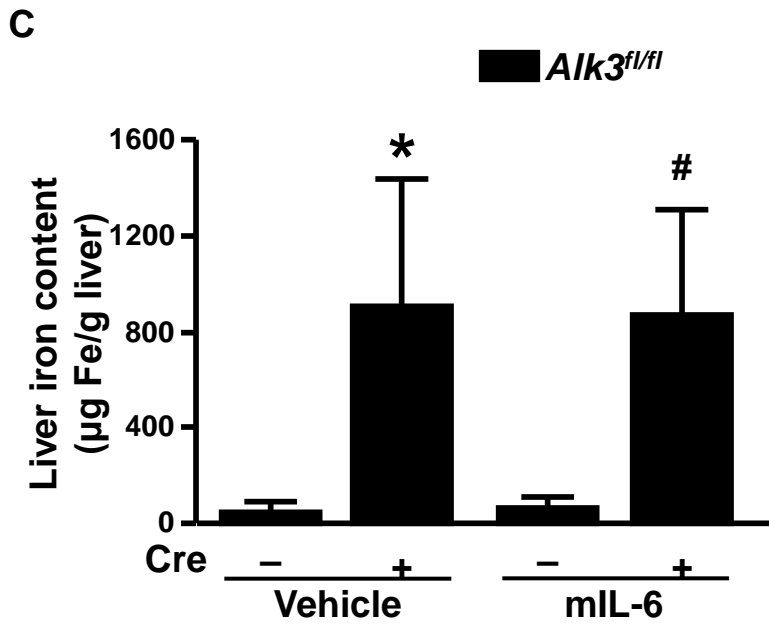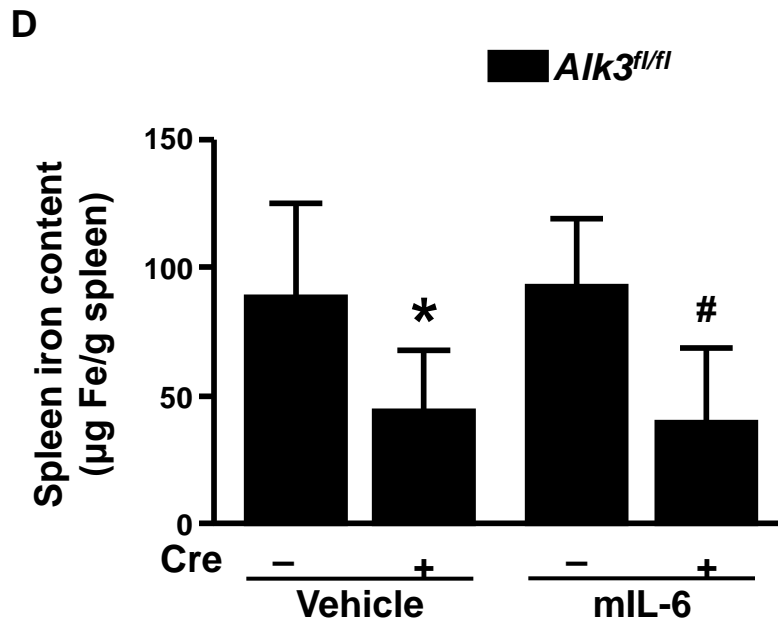

Supplement: supp_blood-2013-02-480095_blood-2013-02-480095-1.pdf [file supp_blood-2013-02-480095_blood-2013-02-480095-1.pdf]
